# Supplementary material
Source: MDPI journal article supplement (https://www.mdpi.com/2073-4352/13/11/1587)
Supplement: s1 [file s1]

# Construction of Energetic Complexes Based on LLM-105 and Transition Metal Cations (Ni, Co, Mn, and Cu)

Yiyi Xiao,<sup>a,b</sup> Hui Huang,<sup>b\*</sup> Jinkun Guo,<sup>b</sup> Mi Yan,<sup>b</sup> Liyuan Wei,<sup>b</sup> Yu Liu,<sup>b</sup> Shiliang Huang,<sup>b\*</sup> Rufang Peng,<sup>a</sup> and Bo Jin,<sup>a\*</sup>

<sup>a</sup> State Key Laboratory of Environment-Friendly Energy Materials, Southwest University of Science and Technology, Mianyang 621010, China

<sup>b</sup> Institute of Chemical Materials, China Academy of Engineering Physics (CAEP), Mianyang 621900, China

## Supporting Information

### Table of Contents

S1: Bond lengths between non-hydrogen atoms.

S2: Geometric parameters of hydrogen bond interactions.

S3: Geometric parameters of  $\pi$ -stacking interactions

S4: Figures of the  $\pi$ -stacking and electrostatic interactions in compound **4**

**S1: Bond lengths between non-hydrogen atoms**

Table S1 Bond lengths between non-hydrogen atoms in compound **1**.

| Type   | <i>d</i> / Å | Type   | <i>d</i> / Å | Type    | <i>d</i> / Å |
|--------|--------------|--------|--------------|---------|--------------|
| Ni1—N9 | 1.841(2)     | C4—N2  | 1.388(3)     | C7—N12  | 1.445(4)     |
| Ni1—O1 | 1.843(2)     | N2—O1  | 1.347(2)     | C8—N10  | 1.324(4)     |
| Ni1—N3 | 1.848(2)     | N5—O3  | 1.234(3)     | C8—N7   | 1.351(3)     |
| Ni1—O6 | 1.8625(19)   | N5—O2  | 1.229(3)     | N7—O6   | 1.360(3)     |
| C1—N1  | 1.325(3)     | N6—O5  | 1.215(3)     | N11—O7  | 1.215(4)     |
| C1—N5  | 1.423(3)     | N6—O4  | 1.223(3)     | N11—O8  | 1.221(3)     |
| C1—C2  | 1.427(3)     | C5—N8  | 1.302(4)     | N12—O10 | 1.218(3)     |
| C2—N4  | 1.310(3)     | C5—C6  | 1.437(4)     | N12—O9  | 1.227(4)     |
| C2—N2  | 1.348(3)     | C5—N11 | 1.447(4)     | O11—C9  | 1.231(4)     |
| C3—N1  | 1.292(3)     | C6—N9  | 1.289(3)     | N13—C9  | 1.306(4)     |
| C3—C4  | 1.443(3)     | C6—N7  | 1.387(3)     | N13—C11 | 1.438(6)     |
| C3—N6  | 1.463(3)     | C7—N8  | 1.306(4)     | N13—C10 | 1.456(5)     |
| C4—N3  | 1.289(3)     | C7—C8  | 1.427(4)     |         |              |

Table S2 Bond lengths between non-hydrogen atoms in compound **2**.

| Type   | <i>d</i> / Å | Type  | <i>d</i> / Å | Type  | <i>d</i> / Å |
|--------|--------------|-------|--------------|-------|--------------|
| Co1—O1 | 2.0413(12)   | C2—N5 | 1.442(2)     | N6—O5 | 1.215(2)     |
| Co1—N4 | 2.0968(18)   | C3—N4 | 1.287(2)     | N6—O4 | 1.222(2)     |
| Co1—O6 | 2.2084(14)   | C3—N1 | 1.406(2)     | O6—C5 | 1.240(2)     |
| O1—N1  | 1.3474(18)   | C3—C4 | 1.449(2)     | C5—N7 | 1.318(2)     |
| C1—N3  | 1.317(2)     | C4—N2 | 1.303(2)     | N7—C6 | 1.451(3)     |
| C1—N1  | 1.352(2)     | C4—N6 | 1.456(2)     | N7—C7 | 1.453(3)     |
| C1—C2  | 1.427(2)     | N5—O3 | 1.211(2)     |       |              |
| C2—N2  | 1.309(2)     | N5—O2 | 1.226(2)     |       |              |

Table S3 Bond lengths between non-hydrogen atoms in compound **3**.

| Type   | <i>d</i> / Å | Type  | <i>d</i> / Å | Type  | <i>d</i> / Å |
|--------|--------------|-------|--------------|-------|--------------|
| Mn1—N4 | 1.893(3)     | C3—N3 | 1.323(5)     | N5—O3 | 1.232(5)     |
| Mn1—O1 | 1.906(2)     | C3—N1 | 1.352(4)     | N6—O4 | 1.217(6)     |
| C1—N4  | 1.292(4)     | C3—C4 | 1.414(6)     | N6—O5 | 1.223(6)     |
| C1—N1  | 1.383(4)     | C4—N2 | 1.308(5)     | O6—C5 | 1.1993(10)   |
| C1—C2  | 1.426(5)     | C4—N6 | 1.452(5)     | N7—C5 | 1.4489(10)   |

|       |          |       |          |        |            |
|-------|----------|-------|----------|--------|------------|
| C2—N2 | 1.302(4) | N1—O1 | 1.350(4) | N7—C6' | 1.4996(10) |
| C2—N5 | 1.440(5) | N5—O2 | 1.221(5) | N7—C6  | 1.4999(10) |

Table S4 Bond lengths between non-hydrogen atoms in compound **4**.

| Type   | <i>d</i> / Å | Type   | <i>d</i> / Å | Type    | <i>d</i> / Å |
|--------|--------------|--------|--------------|---------|--------------|
| Cu1—N3 | 1.920(3)     | N4—O3  | 1.212(5)     | N9—O5   | 1.230(5)     |
| Cu1—N7 | 1.924(3)     | N4—O2  | 1.213(5)     | N9—O6   | 1.234(5)     |
| Cu1—O1 | 1.9960(12)   | C3—N7  | 1.287(5)     | N10—O7  | 1.215(5)     |
| Cu1—O4 | 2.016(3)     | C3—N5  | 1.390(5)     | N10—O8  | 1.237(6)     |
| Cu1—O9 | 2.353(3)     | C3—C4  | 1.436(5)     | O9—C7   | 1.247(5)     |
| Cu2—N8 | 1.907(4)     | C4—N6  | 1.292(5)     | C7—N11  | 1.297(6)     |
| Cu2—O4 | 1.984(2)     | C4—N9  | 1.438(5)     | N11—C9  | 1.429(7)     |
| C1—N2  | 1.303(4)     | C5—N6  | 1.296(6)     | N11—C8  | 1.445(6)     |
| C1—N4  | 1.447(5)     | C5—N10 | 1.436(6)     | N12—C10 | 1.310(11)    |
| C1—C2  | 1.447(5)     | C5—C6  | 1.450(5)     | N12—C11 | 1.325(16)    |
| C2—N3  | 1.283(5)     | C6—N8  | 1.274(5)     | O10—C10 | 1.218(14)    |
| C2—N1  | 1.385(4)     | C6—N5  | 1.365(5)     |         |              |
| N1—O1  | 1.362(5)     | N5—O4  | 1.389(4)     |         |              |

## S2: Geometric parameters of hydrogen bond interactions.

Table S5 Geometric parameters of hydrogen bond interactions in compound **1**.

| Type        | <i>d</i> (D-H) / Å | <i>d</i> (D⋯A) / Å | <i>d</i> (H⋯A) / Å | Angle (D—H⋯A) / ° |
|-------------|--------------------|--------------------|--------------------|-------------------|
| N10—H10A⋯O3 | 0.86               | 3.118              | 2.374              | 145.00            |
| N4—H4A⋯O2   | 0.86               | 2.944              | 2.086              | 176.09            |
| N4—H4B⋯O4   | 0.86               | 2.983              | 2.196              | 152.11            |
| N9—H9⋯O11   | 0.86               | 2.967              | 2.197              | 148.95            |
| N3—H3⋯O11   | 0.86               | 2.886              | 2.099              | 151.89            |
| C9—H91⋯O9   | 0.93               | 3.260              | 2.674              | 121.73            |
| C11—H11A⋯O8 | 0.96               | 3.305              | 2.711              | 120.64            |

Table S6 Geometric parameters of hydrogen bond interactions in compound **2**.

| Type | <i>d</i> (D-H) / Å | <i>d</i> (D⋯A) / Å | <i>d</i> (H⋯A) / Å | Angle (D—H⋯A) / ° |
|------|--------------------|--------------------|--------------------|-------------------|
|------|--------------------|--------------------|--------------------|-------------------|

|             |      |       |       |        |
|-------------|------|-------|-------|--------|
| C6–H6A···O2 | 0.96 | 3.239 | 2.540 | 129.79 |
| N3–H3B···O6 | 0.86 | 2.877 | 2.235 | 131.42 |
| N3–H3A···O1 | 0.86 | 2.836 | 2.261 | 124.30 |
| C7–H7C···O3 | 0.96 | 3.309 | 2.544 | 136.68 |
| C7–H7A···O3 | 0.96 | 3.328 | 2.577 | 135.28 |

Table S7 Geometric parameters of hydrogen bond interactions in compound **3**.

| Type        | $d(\text{D-H}) / \text{\AA}$ | $d(\text{D} \cdots \text{A}) / \text{\AA}$ | $d(\text{H} \cdots \text{A}) / \text{\AA}$ | Angle (D–H···A) / ° |
|-------------|------------------------------|--------------------------------------------|--------------------------------------------|---------------------|
| N3–H3B···O2 | 0.86                         | 3.253                                      | 2.477                                      | 150.42              |
| N3–H3B···O3 | 0.86                         | 3.137                                      | 2.630                                      | 118.85              |
| N3–H3A···O6 | 0.86                         | 2.860                                      | 2.035                                      | 160.69              |

Table S8 Geometric parameters of hydrogen bond interactions in compound **4**.

| Type        | $d(\text{D-H}) / \text{\AA}$ | $d(\text{D} \cdots \text{A}) / \text{\AA}$ | $d(\text{H} \cdots \text{A}) / \text{\AA}$ | Angle (D–H···A) / ° |
|-------------|------------------------------|--------------------------------------------|--------------------------------------------|---------------------|
| C8–H8C···O3 | 0.96                         | 3.103                                      | 2.600                                      | 112.91              |
| C9–H9A···O7 | 0.96                         | 3.166                                      | 2.650                                      | 114.10              |
| N8–H8···O10 | 0.86                         | 3.044                                      | 2.265                                      | 150.68              |

### S3: Geometric parameters of $\pi$ -stacking interactions.

Table S9. Geometric parameters of  $\pi$ -stacking interactions in compounds **1** and **4**.

| <b>1</b>                | <b>O5···Center</b> |
|-------------------------|--------------------|
| Distance / $\text{\AA}$ | 3.315 $\text{\AA}$ |
| <b>4</b>                | <b>C3···Center</b> |
| Distance / $\text{\AA}$ | 3.276              |

**S4: Figures of the  $\pi$ -stacking and electrostatic interactions in compound 4.**

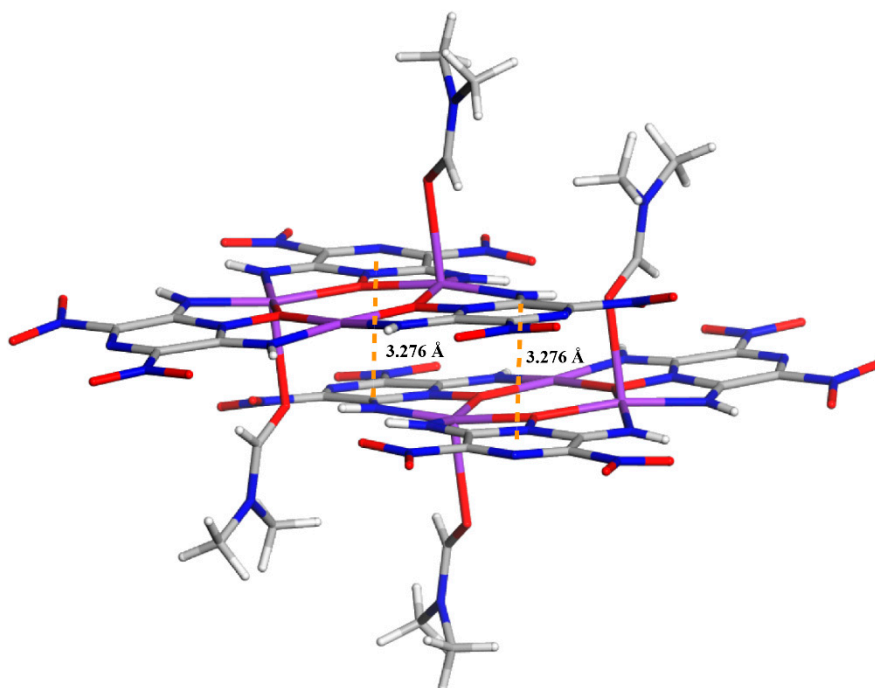

Figure S1. The  $\pi$ -stacking interactions between C3 atoms and pyrazine rings.

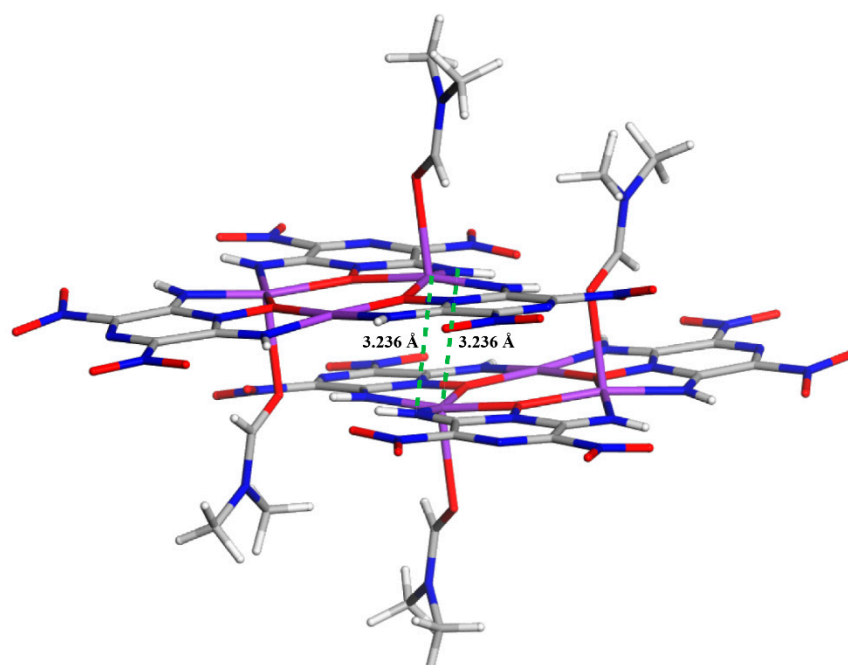

Figure S2. The electrostatic interactions between Cu1 atoms and N3 atoms.

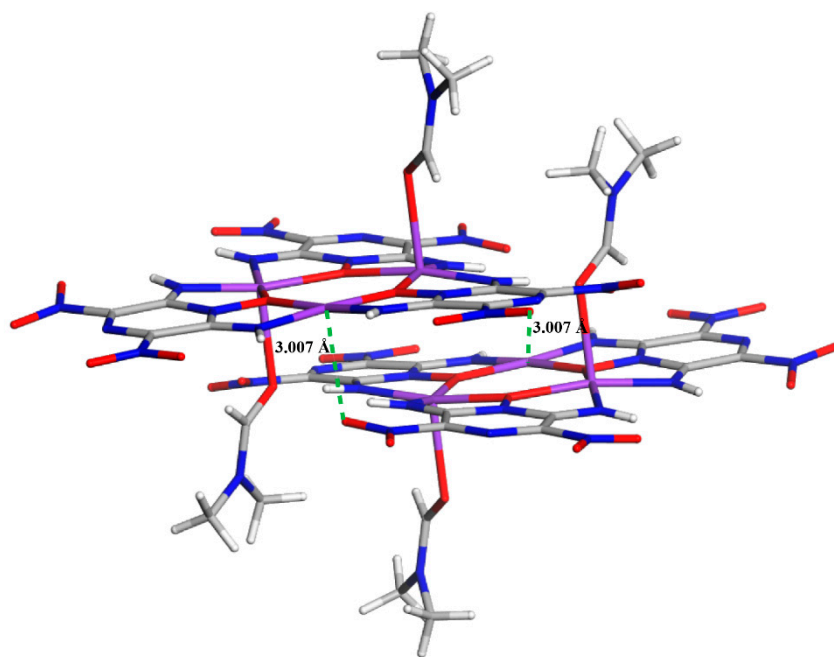

Figure S3. The electrostatic interactions between Cu2 atoms and O2 atoms.
